# Supplementary material for: Platinum single atoms on titania aid dye photodegradation whereas platinum nanoparticles do not
Source: Royal Society of Chemistry journal article supplement (doi:10.1039/d4nr02450h), 2025-01-01

**Bare TiO<sub>2</sub>**

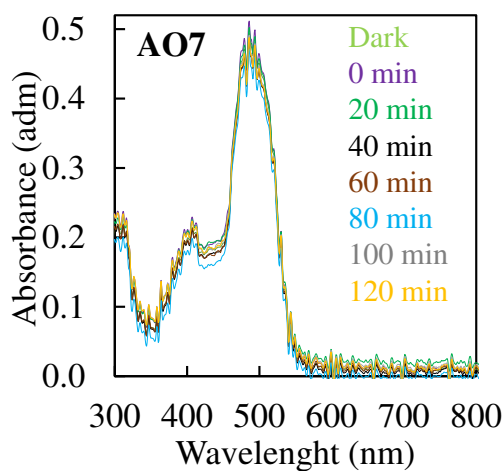

**2 mM Pt SA - TiO<sub>2</sub>**

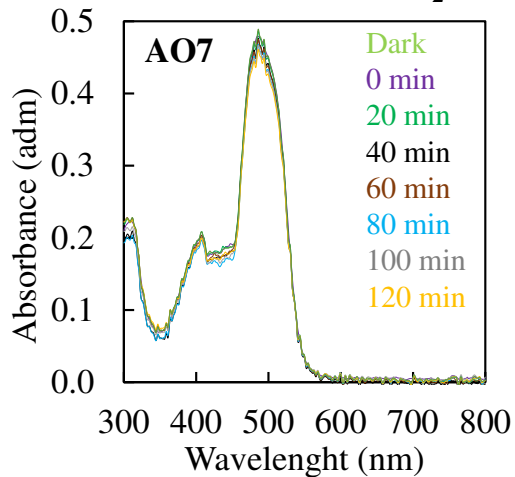

**0.005 mM Pt NP - TiO<sub>2</sub>**

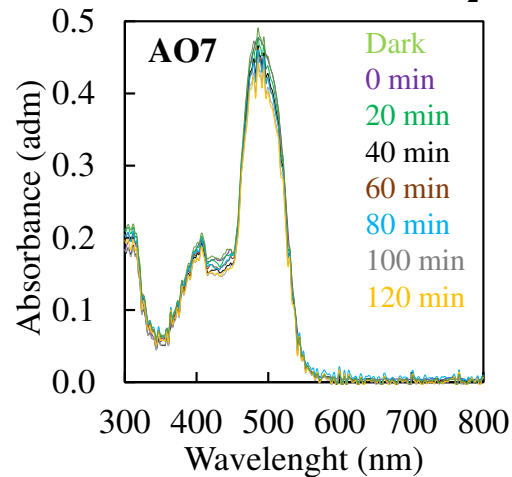

**Bare TiO<sub>2</sub>**

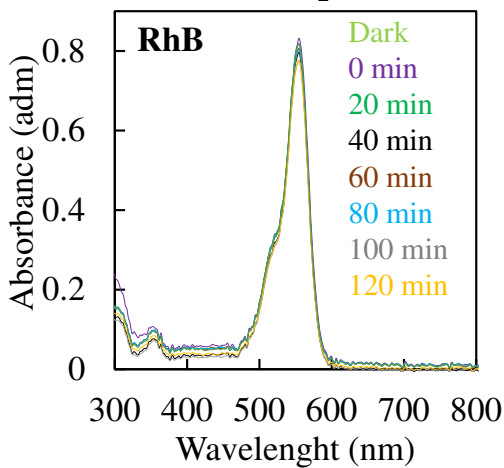

**0.005 mM Pt SA - TiO<sub>2</sub>**

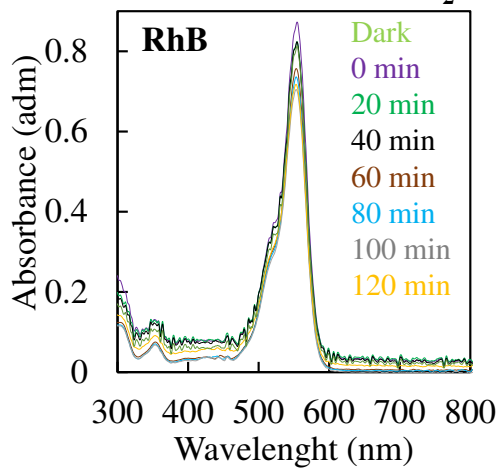

**0.005 mM Pt NP - TiO<sub>2</sub>**

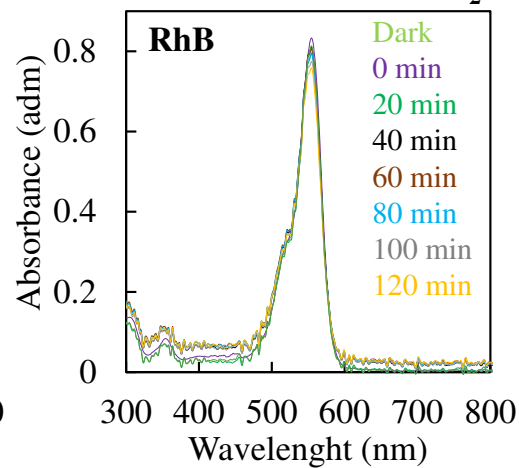

Supplement: d4nr02450h9.pdf [file d4nr02450h9.pdf]
