# Supplementary figures and images for: Platinum single atoms on titania aid dye photodegradation whereas platinum nanoparticles do not
Source: Royal Society of Chemistry journal article supplement (doi:10.1039/d4nr02450h), 2025-01-01

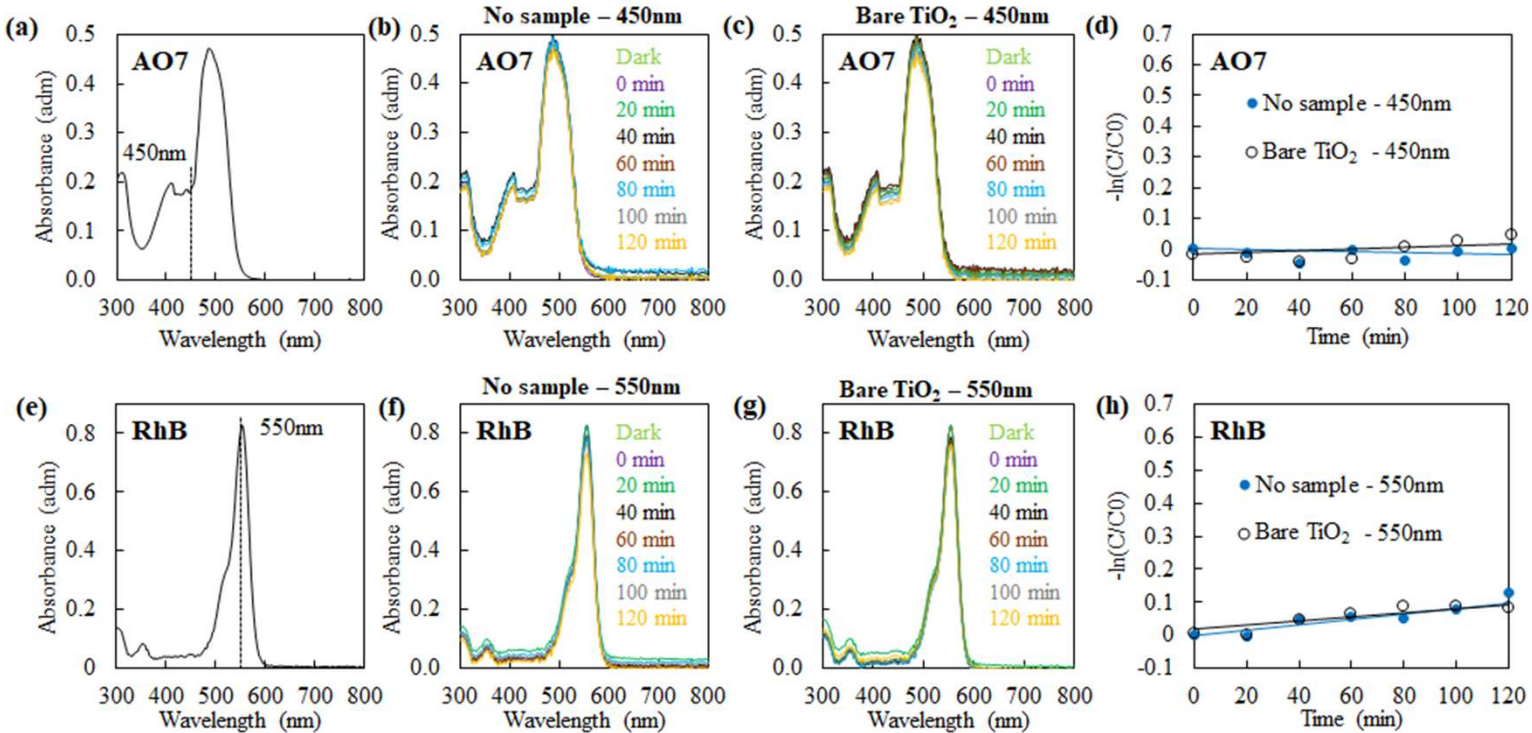

Supplement: d4nr02450h10.pdf [file d4nr02450h10.pdf]

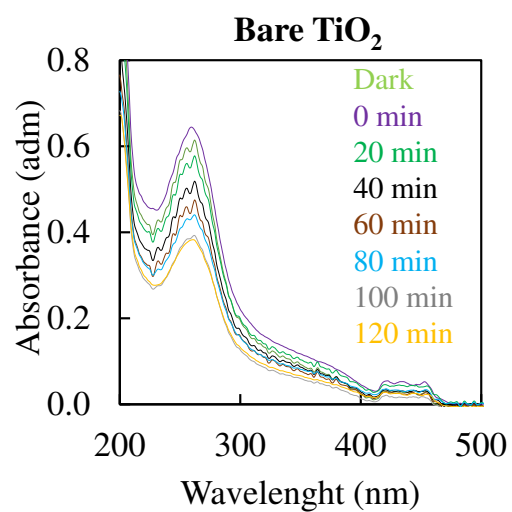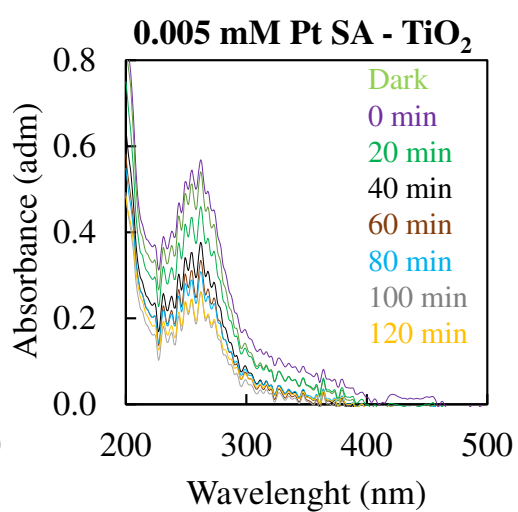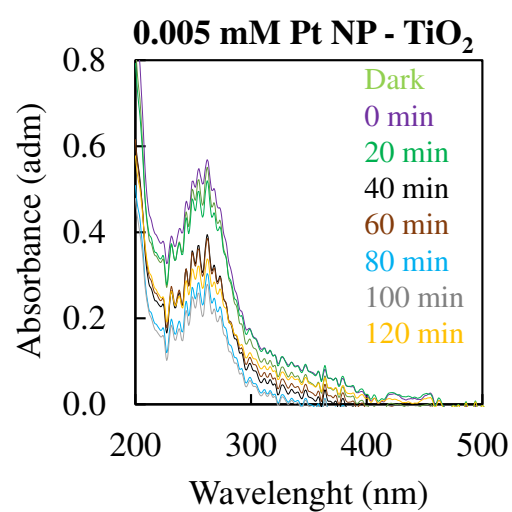

Supplement: d4nr02450h11.pdf [file d4nr02450h11.pdf]

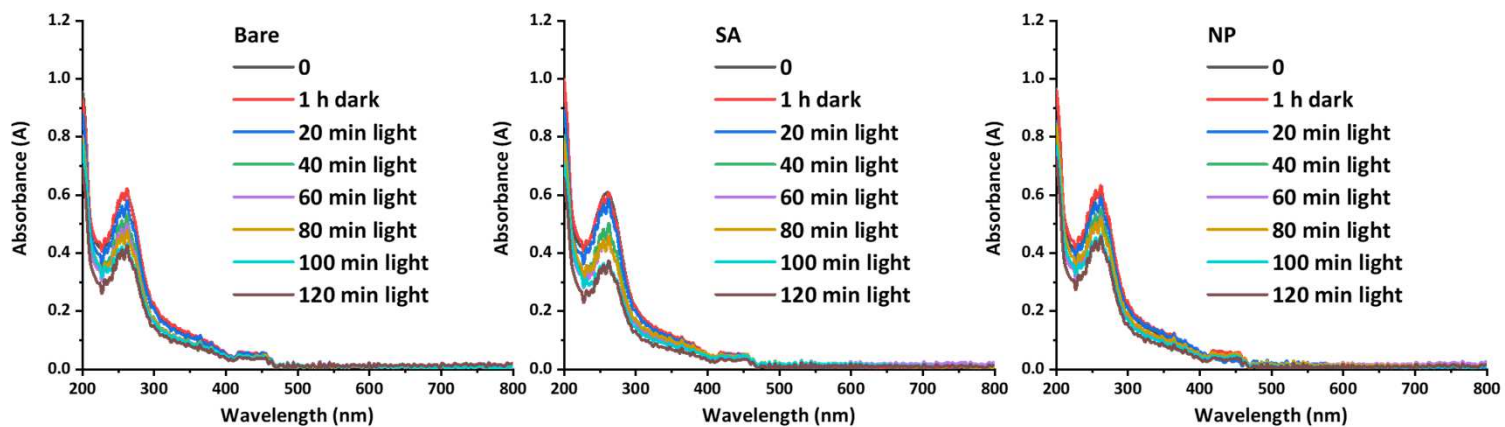

Supplement: d4nr02450h12.pdf [file d4nr02450h12.pdf]

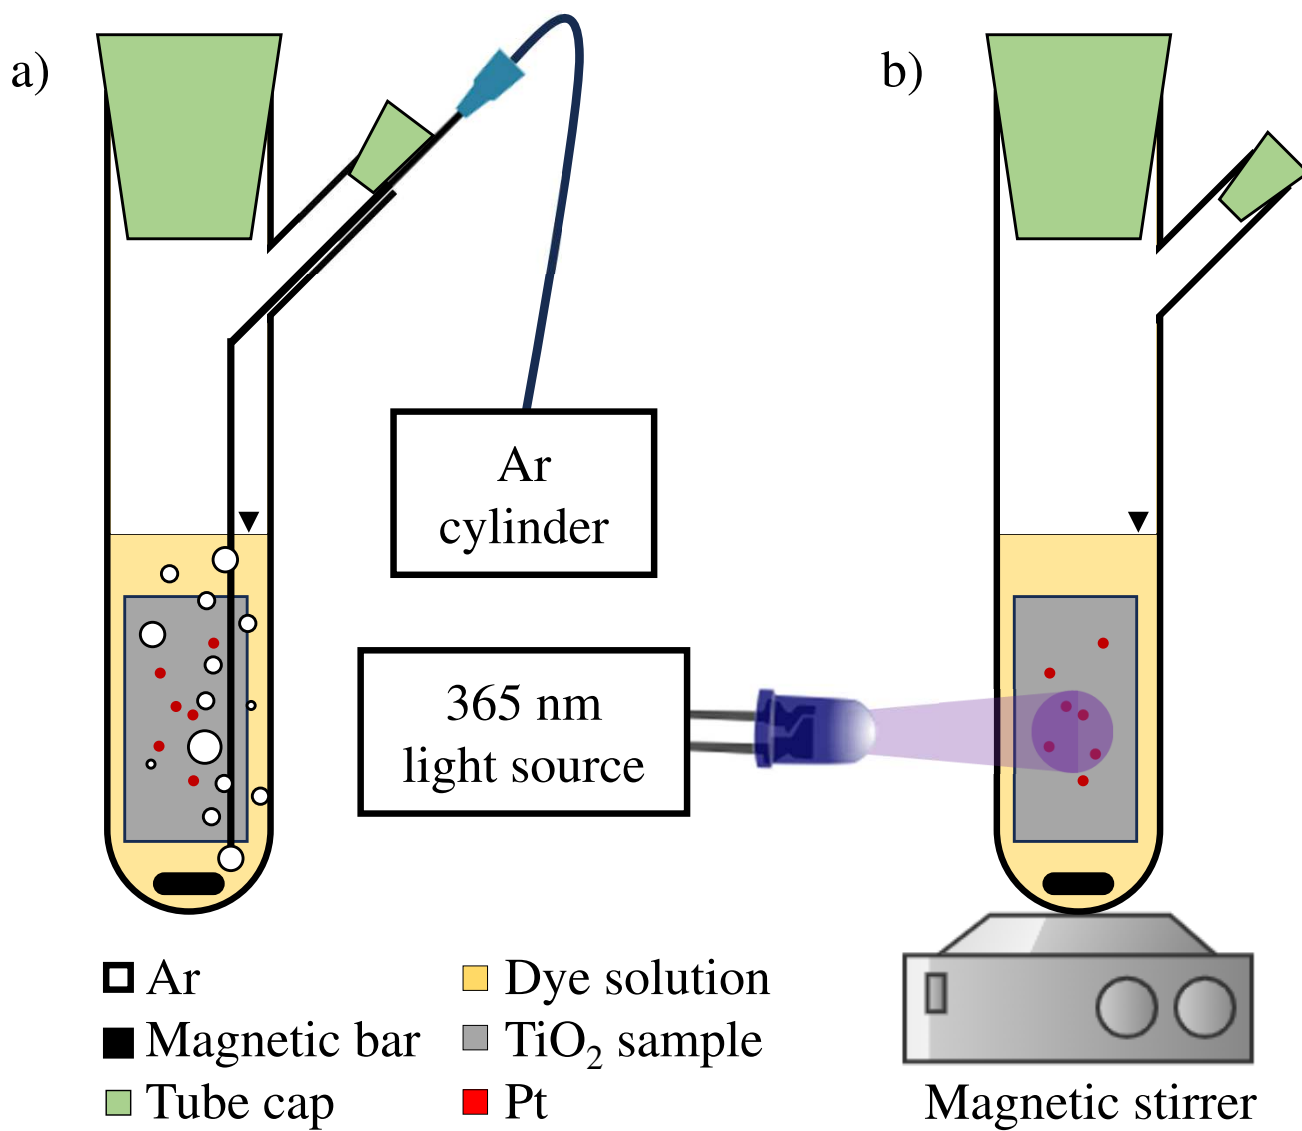

Supplement: d4nr02450h2.pdf [file d4nr02450h2.pdf]

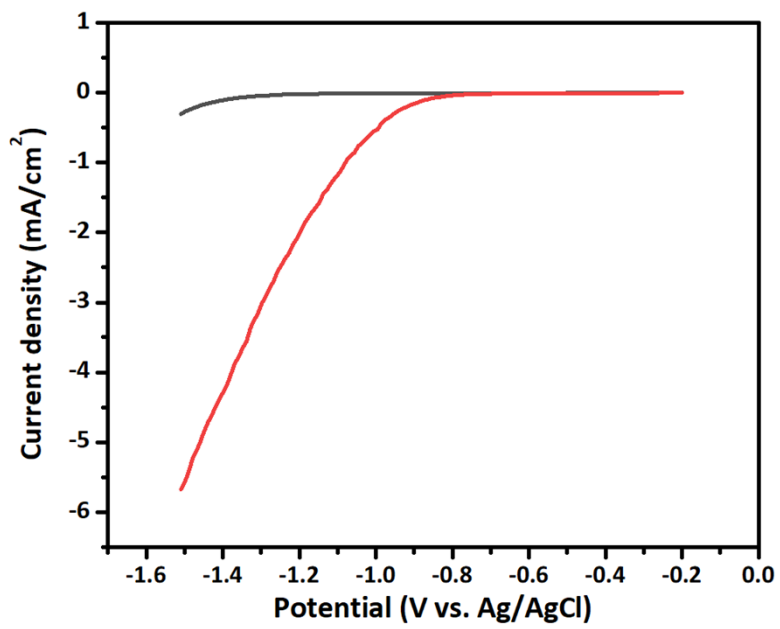

Supplement: d4nr02450h3.pdf [file d4nr02450h3.pdf]

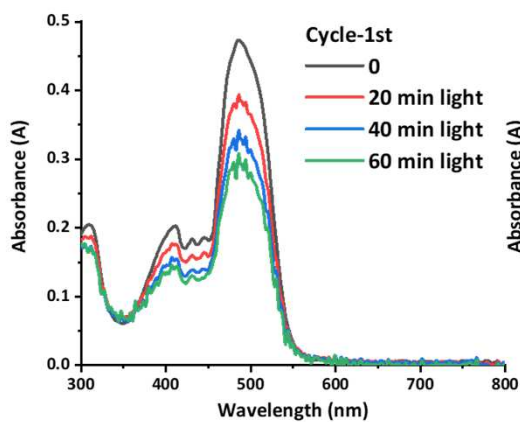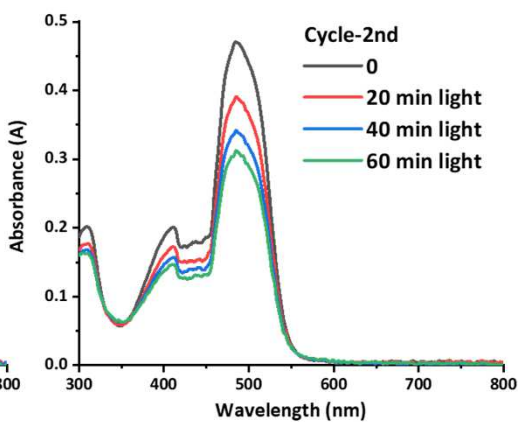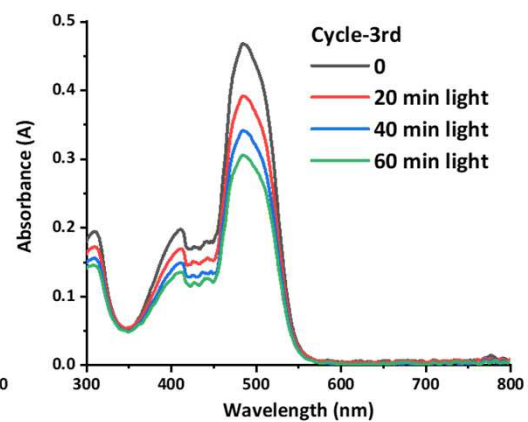

Supplement: d4nr02450h4.pdf [file d4nr02450h4.pdf]

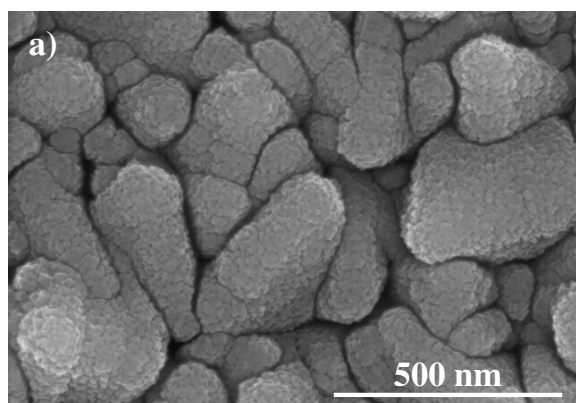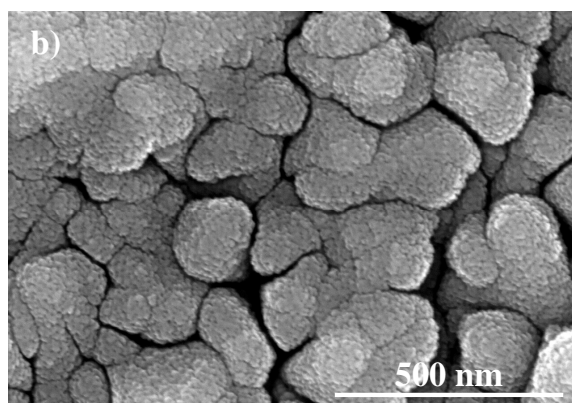

Supplement: d4nr02450h5.pdf [file d4nr02450h5.pdf]

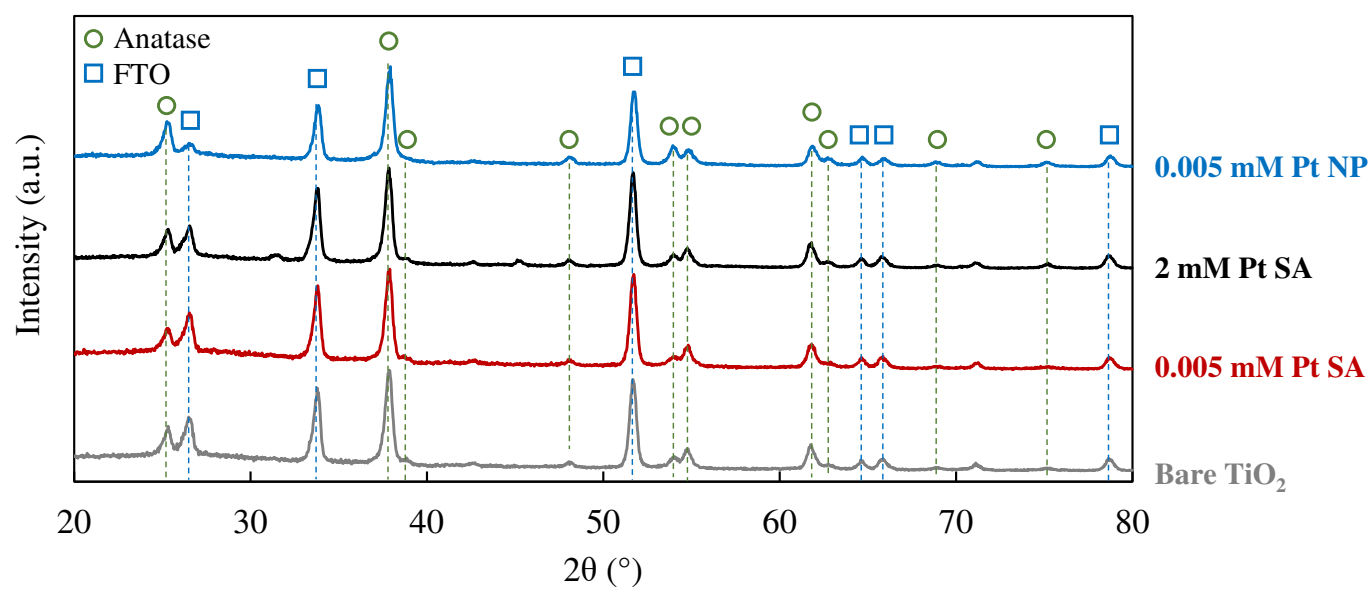

Supplement: d4nr02450h6.pdf [file d4nr02450h6.pdf]
